# Supplementary material for: Serum and cerebrospinal fluid host proteins indicate stroke in children with tuberculous meningitis
Source: PubMed Central journal article supplement (PMC8087017; doi:10.1371/journal.pone.0250944), 2021-04-30
Supplement: pone.0250944.s002.pdf [file pone.0250944.s002.pdf]

**S1 Table: List of all host proteins evaluated in serum and cerebrospinal fluid using Luminex multiplex immunoassay and the suppliers of the reagent kits.**

| <b>Reagents kits purchased from Merck Millipore, Billerica, MA, USA</b>       |                                                                                                                                                                                                                                                                                                                                          |
|-------------------------------------------------------------------------------|------------------------------------------------------------------------------------------------------------------------------------------------------------------------------------------------------------------------------------------------------------------------------------------------------------------------------------------|
| <b>Panel names and catalogue numbers</b>                                      | <b>Analytes included in the kits</b>                                                                                                                                                                                                                                                                                                     |
| Human Cardiovascular Disease (CVD)<br>Magnetic Bead Panel 2<br>(HCVD2MAG-67K) | Von Willebrand factor-cleaving protease (ADAMTS13), D-dimer, growth differentiation factor (GDF)-15, Myoglobin, soluble intracellular adhesion molecule (sICAM)-1, myeloperoxidase (MPO), P-selectin, Neutrophil gelatinase-associated lipocalin (NGAL)/ lipocalin2, soluble vascular adhesion molecule (sVCAM)-1, serum amyloid A (SAA) |
| Human Neurodegenerative Disease<br>Magnetic Bead Panel 1<br>(HNDG1MAG-36K)    | Apolipoprotein (Apo)-AI, Apo-CIII, complement factor H (CFH), complement Component 3 (CC3)                                                                                                                                                                                                                                               |
| Human Neurodegenerative Disease<br>Magnetic Bead Panel 2<br>(HNDG2MAG-36K)    | C reactive protein (CRP), alpha-1-Antitrypsin (A1AT), pigment epithelium-derived factor (PEDF), serum amyloid P (SAP), Macrophage inflammatory protein (MIP)-4/ CCL18, complement C4 (CC4)                                                                                                                                               |
| Human Neurodegenerative Disease<br>Magnetic Bead Panel 3<br>(HNDG3MAG-36K)    | Brain-derived neurotrophic factor (BDNF), cathepsin D, ICAM-1, MPO, platelet derived growth factor (PDGF)-AA, Regulated upon activation, normally T-expressed, and presumably secreted (RANTES)/ CCL5, neural cell adhesion molecule (NCAM), PDGF-AA/BB, VCAM-1, plasminogen activator inhibitor (PAI)- 1 total                          |
| Human Neurodegenerative Disease<br>Magnetic Bead Panel 4<br>(HNDG4MAG-36K)    | S100 calcium-binding protein B (S100B), amyloid beta 1-40 (A $\beta$ 40), A $\beta$ 42, soluble receptor for advanced glycation end products (sRAGE) , glial cell-derived neurotrophic factor (GDNF)                                                                                                                                     |
| Human Complement Magnetic Bead Panel 1<br>(HCMP1MAG-19K)                      | Complement C2 (CC2), CC5, CC4b, CC5a, CC9, complement factor D (CFD), mannose binding lectin (MBL), complement factor 1 (CF1)                                                                                                                                                                                                            |

| <b>Reagent kits purchased from R&amp;D SYSTEMS Inc. (Biotechne®), Minneapolis, USA</b> |                                                                                                                                                                                                                                                                                                                                                                                                                                                                                                                                                                                                                                                                                              |
|----------------------------------------------------------------------------------------|----------------------------------------------------------------------------------------------------------------------------------------------------------------------------------------------------------------------------------------------------------------------------------------------------------------------------------------------------------------------------------------------------------------------------------------------------------------------------------------------------------------------------------------------------------------------------------------------------------------------------------------------------------------------------------------------|
| Human Magnetic Luminex Screening Assay (LXSAHM- 24)                                    | CCL1 (I-309), CCL4 (macrophage inflammatory protein (MIP)-1 $\beta$ ), CXCL8 (IL-8), granulocyte-macrophage colony-stimulating factor (GM-CSF), interleukin (IL)-10, IL-17A, IL-6, matrix metalloproteinase (MMP)-8, CCL2 (monocyte chemoattractant protein (MCP)-1), CD40 ligand (CD40L), Monokine induced by interferon gamma (MIG)/ CXCL9 (MIG), interferon (IFN)- $\gamma$ , IL-12/23p40, IL-21, IL-7, transforming growth factor (TGF)- $\alpha$ , CCL3/Macrophage inflammatory protein (MIP)-1 $\alpha$ , CXCL10/ interferon gamma inducible protein (IP)-10, granulocyte colony-stimulating factor (G-CSF), IL-1 $\beta$ , IL-13, IL-4, MMP-1, tumour necrosis factor (TNF)- $\alpha$ |
| Human Magnetic Luminex Screening Assay (LXSAHM- 03)                                    | MMP-7, CD56 (NCAM-1), vascular endothelial growth factor (VEGF)-A                                                                                                                                                                                                                                                                                                                                                                                                                                                                                                                                                                                                                            |
| Human Magnetic Luminex Screening Assay (LXSAHM- 02)                                    | Ferritin, MMP-9                                                                                                                                                                                                                                                                                                                                                                                                                                                                                                                                                                                                                                                                              |
