# Supplementary material for: Serum and cerebrospinal fluid host proteins indicate stroke in children with tuberculous meningitis
Source: PubMed Central journal article supplement (PMC8087017; doi:10.1371/journal.pone.0250944), 2021-04-30
Supplement: pone.0250944.s003.pdf [file pone.0250944.s003.pdf]

**S2 Table: Expression of CSF host inflammatory biomarkers amongst study participants with TBM and stroke/no stroke at admission, and utility of individual CSF host protein biomarkers in indicating stroke in TBM patients.** The least square (LS) means (95% Confidence intervals) of all host markers and accuracies in the indication of stroke amongst children with TBM are shown. #reported in ng/ml, all other markers are reported in pg/ml.

| Marker                       | TBM-stroke                 | TBM-no stroke                | Not-TBM                   | P value <sup>a</sup> | P value <sup>b</sup> | P value <sup>c</sup> | Utility in indicating stroke in TBM patients |               |               |               |
|------------------------------|----------------------------|------------------------------|---------------------------|----------------------|----------------------|----------------------|----------------------------------------------|---------------|---------------|---------------|
|                              |                            |                              |                           |                      |                      |                      | AUC (95% CI)                                 | Cut-off value | Sensitivity % | Specificity % |
| sVCAM-1                      | 83883.4 (50069.4-117697.3) | 161261.8 (119088.4-203435.2) | 64955.1 (39129.2-90780.9) | 0.0060               | 0,3748               | 0,0003               | 0.79 (0.60-0.98)                             | 120343.5      | 77.80         | 71.40         |
| MMP-1                        | 493.5 (288.6-698.5)        | 942.7 (687.0-1198.3)         | 462.5 (306.0-619.0)       | 0.0083               | 0,8094               | 0,0024               | 0.76 (0.53-0.99)                             | 480.355       | 77.80         | 71.40         |
| sRAGE                        | 14.8 (12.8-16.9)           | 10.4 (7.8-12.9)              | 14.8 (13.2-16.3)          | 0.0086               | 0,9603               | 0,0049               | 0.78 (0.53-1.00)                             | 13.14         | 92.90         | 66.70         |
| CXCL10/ILP-10                | 36270.7 (26910.6-45630.8)  | 16554.0 (4879.9-28228.2)     | 7338.6 (189.7-14487.5)    | 0.0110               | 0,0000               | 0,1818               | 0.73 (0.51-0.95)                             | 7877.2        | 85.70         | 66.70         |
| PDGF-AA                      | 11.3 (7.3-15.3)            | 18.4 (13.4-23.4)             | 7.1 (4.0-10.1)            | 0.0297               | 0,0952               | 0,0003               | 0.71 (0.46-0.95)                             | 18.29         | 55.60         | 85.70         |
| #LIPOCALIN-2/NGAL            | 118.7 (88.9-148.4)         | 38.7 (1.6-75.8)              | 11.1 (-11.6-33.9)         | 0.0330               | 0,0002               | 0,4799               | 0.82 (0.63-1.00)                             | 45.88         | 78.60         | 77.80         |
| #Apo CIII                    | 115.9 (30.0-201.8)         | 248.3 (141.2-355.5)          | 79.1 (12.0-146.1)         | 0.0584               | 0,4989               | 0,0099               | 0.76 (0.54-0.98)                             | 85.14         | 88.90         | 78.60         |
| GM-CSF                       | 92.9 (75.11-110.6)         | 66.0 (43.8-88.1)             | 36.4 (22.9-50.0)          | 0.0627               | 0,0000               | 0,0265               | 0.70 (0.43-0.98)                             | 71.08         | 85.70         | 66.70         |
| #D-dimer                     | 91101.8 (69953.6-112250.0) | 43555.6 (17179.2-69932.0)    | 20614.5 (4462.4-36766.7)  | 0.0645               | 0,0000               | 0,4752               | 0.76 (0.57-0.95)                             | 712.58        | 100.00        | 55.60         |
| Ferritin                     | 6863.4 (3512.1-10214.6)    | 11516.7 (7337.0-15696.4)     | 3129.6 (570.1-5689.2)     | 0.0870               | 0,0812               | 0,0013               | 0.66 (0.41-0.91)                             | 6166.45       | 66.70         | 71.40         |
| BDNF                         | 0.9 (0.5-1.2)              | 0.4 (-0.0-0.8)               | 0.6 (0.3-0.9)             | 0.0893               | 0,2117               | 0,4231               | 0.75 (0.50-1.00)                             | 0.175         | 92.90         | 66.70         |
| GDNF                         | 2.3 (1.8-2.9)              | 1.1 (0.5-1.8)                | 1.9 (1.5-2.3)             | 0.0969               | 0,2010               | 0,3372               | 0.80 (0.57-1.00)                             | 2.11          | 71.40         | 77.80         |
| CATHEPSIN                    | 68033.5 (47411.5-88655.5)  | 94923.7 (69203.5-120643.8)   | 76489.0 (60738.6-92239.3) | 0.1073               | 0,5148               | 0,2245               | 0.65 (0.37-0.93)                             | 88682.78      | 55.60         | 92.90         |
| #Adipsin/Complement factor D | 77.5 (22.3-132.7)          | 149.3 (80.4-218.2)           | 149.3 (36.7-121.1)        | 0.1081               | 0,9668               | 0,0859               | 0.60 (0.33-0.88)                             | 69.655        | 55.60         | 71.40         |

|               |                             |                            |                              |        |        |        |                  |          |       |       |
|---------------|-----------------------------|----------------------------|------------------------------|--------|--------|--------|------------------|----------|-------|-------|
| #ADAMT S13    | 13.2 (8.3-18.1)             | 6.8 (0.7-13.0)             | 7.7 (4.0-11.5)               | 0.1112 | 0,0826 | 0,8049 | 0.73 (0.47-1.00) | 6.525    | 92.90 | 66.70 |
| #PEDF         | 761.2 (654.6-867.7)         | 898.4 (765.4-1031.3)       | 714.7 (633.3-796.1)          | 0.1118 | 0,4888 | 0,0220 | 0.72 (0.50-0.94) | 747.445  | 77.80 | 71.40 |
| #A1AT         | 3915.0 (2677.6-5152.4)      | 2337.9 (794.6-3881.2)      | 1079.2 (134.1-2024.3)        | 0.1153 | 0,0007 | 0,1680 | 0.72 (0.49-0.95) | 1317.25  | 85.70 | 66.70 |
| sICAM1        | 2680.3 (1368.8-3991.8)      | 4298.5 (2662.8-5934.2)     | 1544.8 (543.1-2546.5)        | 0.1270 | 0,1725 | 0,0059 | 0.71 (0.49-0.94) | 2895.005 | 66.70 | 78.60 |
| Apo AI        | 2670.8 (1069.1-4272.5)      | 4585.3 (2587.6-6582.9)     | 1431.9 (208.6-2655.2)        | 0.1390 | 0,2220 | 0,0095 | 0.71 (0.48-0.94) | 2038.855 | 77.80 | 71.40 |
| CCL3          | 336.6 (252.8-420.4)         | 237.3 (132.8-341.8)        | 185.4 (121.4-249.4)          | 0.1423 | 0,0060 | 0,3980 | 0.73 (0.49-0.97) | 299.535  | 64.30 | 77.80 |
| IL-4          | 229.1 (162.8-295.4)         | 150.9 (68.2-233.6)         | 216.1 (165.5-266.8)          | 0.1442 | 0,7563 | 0,1819 | 0.62 (0.38-0.85) | 204.35   | 42.90 | 88.90 |
| PAI-1         | 6130.7 (2972.1-9289.2)      | 12483.7 (8544.3-16423.0)   | 2122.6 (-289.8-4535.0)       | 0.1939 | 0,0342 | 0,0283 | 0.67 (0.39-0.96) | 9714.745 | 66.70 | 78.60 |
| PDGF-AB/BB    | 11.2 (7.6-14.8)             | 18.6 (14.1-23.1)           | 4.5 (1.7-7.2)                | 0.2069 | 0,0245 | 0,0092 | 0.74 (0.50-0.98) | 13.485   | 77.80 | 71.40 |
| #SAP          | 95.2 (35.0-155.3)           | 155.5 (80.4-230.5)         | 62.8 (16.8-108.7)            | 0.2131 | 0,3930 | 0,0394 | 0.65 (0.40-0.91) | 62.555   | 77.80 | 64.30 |
| IL-13         | 991.0 (616.8-1365.3)        | 625.3 (158.5-1092.1)       | 545.3 (259.5-831.2)          | 0.2246 | 0,2246 | 0,7696 | 0.67 (0.43-0.91) | 856.895  | 57.10 | 77.80 |
| IL-10         | 48.2 (29.2-67.1)            | 66.0 (42.3-89.7)           | 13.9 (-0.90-28.7)            | 0.2427 | 0,0063 | 0,0005 | 0.63 (0.36-0.89) | 49.47    | 66.70 | 71.40 |
| TGF- $\alpha$ | 17.0 (11.7-22.2)            | 12.0 (5.5-18.6)            | 5.6 (1.6-9.6)                | 0.2436 | 0,0012 | 0,0993 | 0.65 (0.40-0.90) | 8.695    | 85.70 | 55.60 |
| #P-Selectin   | 4.3 (1.8-6.8)               | 0.6 (-2.6-3.7)             | 0.6 (-1.4-2.5)               | 0.2515 | 0,2526 | 1,0000 | 0.81 (0.61-1.00) | 0.805    | 92.90 | 77.80 |
| MPO           | 59903.4 (42452.5-77354.3)   | 75660.9 (53895.8-97426.0)  | 11952.9 (-1375.4-25281.3)    | 0.2611 | 0,0001 | 0,0000 | 0.44 (0.17-0.70) | 59743.38 | 55.60 | 57.10 |
| VEGF          | 160.6 (71.4-249.9)          | 82.5 (-28.9-193.8)         | 39.5 (-28.7-107.7)           | 0.2756 | 0,0352 | 0,5107 | 0.58 (0.33-0.83) | 34.635   | 64.30 | 55.60 |
| #CC9          | 44.6 (31.1-58.2)            | 55.1 (38.2-72.0)           | 30.9 (20.5-41.2)             | 0.3357 | 0,1110 | 0,0177 | 0.58 (0.29-0.87) | 55.97    | 55.60 | 85.70 |
| CCL4          | 477.7 (344.1-611.4)         | 381.3 (214.6-548.0)        | 244.6 (142.5-346.7)          | 0.3680 | 0,0077 | 0,1659 | 0.72 (0.45-0.99) | 317.52   | 78.60 | 77.80 |
| IL-7          | 6.1 (3.0-9.3)               | 4.0 (0.0-8.0)              | 6.5 (4.1-9.0)                | 0.3988 | 0,8471 | 0,2781 | 0.59 (0.35-0.83) | 5.355    | 50.00 | 66.70 |
| NCAM1         | 108579.9 (76126.1-141033.8) | 86967.3 (46490.3-127444.5) | 135130.0 (110343.0-159917.1) | 0.4057 | 0,1969 | 0,0469 | 0.57 (0.33-0.81) | 107522.1 | 50.00 | 77.80 |

|             |                             |                              |                            |        |        |        |                  |          |       |        |
|-------------|-----------------------------|------------------------------|----------------------------|--------|--------|--------|------------------|----------|-------|--------|
| #CC4b       | 509.1 (387.8-630.5)         | 586.5(435.2-737.8)           | 257.5 (164.8-350.1)        | 0.4258 | 0,0018 | 0,0005 | 0.64 (0.40-0.89) | 524.93   | 77.80 | 57.10  |
| IL-21       | 68.4 (36.5-100.4)           | 50.2 (10.3-90.0)             | 63.4 (39.0-87.8)           | 0.4749 | 0,8009 | 0,5719 | 0.48 (0.23-0.74) | 44.185   | 57.10 | 55.60  |
| LL-37       | 0.05 (0.05-0.06)            | 0.05 (0.05-0.06)             | 0.05 (0.05-0.07)           | 0.4907 | 0,8454 | 0,5576 | 0.61 (0.36-0.86) | 0.0495   | 66.70 | 57.10  |
| RANTES      | 27.6 (18.2-37.1)            | 38.6 (26.9-50.4)             | 6.3 (-1.0-13.5)            | 0.4943 | 0,0047 | 0,0080 | 0.63 (0.38-0.89) | 35.125   | 55.60 | 71.40  |
| CCL2        | 1237.0 (719.6-1754.3)       | 957.8 (312.6-1603.1)         | 1320.7 (925.5-1715.8)      | 0.4999 | 0,7967 | 0,3391 | 0.42 (0.16-0.68) | 943.6    | 64.30 | 44.40  |
| CD40L       | 604.2 (428.7-779.7)         | 509.7 (290.8-728.6)          | 329.7 (195.6-463.7)        | 0.5011 | 0,0160 | 0,1645 | 0.49 (0.23-0.75) | 494.365  | 64.30 | 55.60  |
| #CRP        | 147998.5 (89845.9-206151.0) | 178988.0 (106459.0-251517.0) | 67347.6 (22932.9-111762.4) | 0.5052 | 0,0315 | 0,0113 | 0.58 (0.39-0.77) | 115529.9 | 77.80 | 35.70  |
| #Myoglobin  | 4.6 (0.3-8.9)               | 2.3 (-3.1-7.7)               | 2.1 (-1.2-5.4)             | 0.5085 | 0,3676 | 0,9567 | 0.75 (0.52-0.99) | 0.48     | 64.30 | 77.80  |
| #CFH        | 4392.1 (1282.6-7501.6)      | 6001.8 (2123.6-9880.0)       | 1354.6 (-1071.4-3780.6)    | 0.5172 | 0,1277 | 0,0466 | 0.74 (0.53-0.95) | 1182.3   | 77.80 | 64.30  |
| MMP-8       | 12642.6 (8885.6-16399.6)    | 8871.5 (4185.7-13557.3)      | 1630.9 (-1238.6-4500.4)    | 0.5476 | 0,0020 | 0,0537 | 0.60 (0.35-0.84) | 13717.38 | 42.90 | 77.80  |
| IL-6        | 586.3 (349.5-823.1)         | 846.5 (551.2-1141.8)         | 74.4 (-106.4-255.3)        | 0.5497 | 0,0107 | 0,0109 | 0.63 (0.39-0.88) | 530.68   | 66.70 | 64.30  |
| #CF1        | 570.0 (305.0-834.9)         | 695.0 (364.6-1025.4)         | 361.0 (158.6-563.3)        | 0.5549 | 0,2131 | 0,0893 | 0.56 (0.30-0.81) | 316.865  | 77.80 | 42.90  |
| #MBL        | 23.1 (12.5-33.6)            | 27.5 (14.4-40.7)             | 8.1 (0.1-16.2)             | 0.5953 | 0,0285 | 0,0149 | 0.47 (0.19-0.74) | 11.75    | 44.40 | 64.30  |
| #CC2        | 2584.6 (1591.5-3577.8)      | 2996.5 (1757.8-4235.2)       | 750.8 (-7.8-1509.3)        | 0.6037 | 0,0050 | 0,0032 | 0.55 (0.28-0.82) | 2228.665 | 66.70 | 64.30  |
| CXCL8       | 1111.0 (702.0-1520.0)       | 1262.5 (752.4-1772.6)        | 393.1 (80.7-705.5)         | 0.6428 | 0,0073 | 0,0054 | 0.51 (0.22-0.80) | 1179.51  | 55.60 | 78.60  |
| IL-12/23p40 | 415.5 (191.3-639.8)         | 345.5 (65.8-625.3)           | 210.9 (939.6-382.2)        | 0.6958 | 0,1510 | 0,4125 | 0.5 (0.25-0.74)  | 241.99   | 57.10 | 66.70  |
| IL-17A      | 20.1 (11.3-28.6)            | 17.3 (6.5-28.1)              | 7.8 (1.2-14.4)             | 0.6967 | 0,0288 | 0,1367 | 0.62 (0.34-0.90) | 12.045   | 71.40 | 66.70  |
| G-CSF       | 446.5 (251.7-641.3)         | 506.8 (263.9-749.7)          | 167.0 (18.3-315.8)         | 0.6981 | 0,0264 | 0,0205 | 0.58 (0.33-0.83) | 435.56   | 55.60 | 71.40  |
| #MIP4       | 68.8 (52.3-85.3)            | 54.9 (34.3-75.4)             | 2.1 (-10.5-14.7)           | 0.6991 | 0,0006 | 0,0030 | 0.55 (0.30-0.81) | 109.15   | 35.70 | 100.00 |
| GDF-15      | 0.4 (0.2-0.7)               | 0.4 (0.0-0.7)                | 0.3 (0.1-0.4)              | 0.7034 | 0,2764 | 0,5993 | 0.69 (0.41-0.98) | 0.28     | 78.60 | 66.70  |
| #SAA        | 2282.1 (1317.2-3246.9)      | 1531.1 (327.7-2734.5)        | 1531.1 (-216.3-1257.5)     | 0.7182 | 0,0314 | 0,4536 | 0.73 (0.47-0.99) | 5.92     | 92.90 | 66.70  |

|               |                           |                          |                          |        |        |        |                  |          |       |       |
|---------------|---------------------------|--------------------------|--------------------------|--------|--------|--------|------------------|----------|-------|-------|
| CXCL9         | 14266.0 (10933.1-17598.9) | 11260.7 (7103.9-15417.6) | 1834.5 (-711.1-4380.0)   | 0.7218 | 0,0003 | 0,0394 | 0.62 (0.36-0.88) | 9538.38  | 71.40 | 55.60 |
| IL-1b         | 46.5 (29.4-63.7)          | 49.9 (28.5-71.2)         | 14.6 (1.5-27.7)          | 0.8075 | 0,0047 | 0,0069 | 0.53 (0.27-0.78) | 46.085   | 66.70 | 57.10 |
| #CC4          | 1586.8 (1017.5-2156.2)    | 1695.5 (985.4-2405.6)    | 583.9 (149.1-1018.7)     | 0.8110 | 0,0071 | 0,0100 | 0.60 (0.35-0.85) | 1304.765 | 66.70 | 64.30 |
| MMP-9         | 4624.1 (3104.2-6144.0)    | 4334.3 (2438.8-6229.9)   | 790.8175 (-370.0-1951.6) | 0.8112 | 0,0002 | 0,0025 | 0.57 (0.30-0.84) | 4344.495 | 50.00 | 66.70 |
| #CC3          | 1344.3 (676.8-2011.9)     | 1462.0 (629.5-2294.6)    | 697.3 (176.5-1218.1)     | 0.8251 | 0,1306 | 0,1236 | 0.57 (0.32-0.83) | 861.065  | 77.80 | 57.10 |
| CCL1          | 210.8 (164.5-257.1)       | 184.5 (126.8-242.3)      | 15.8 (-19.6-51.1)        | 0.8814 | 0,0000 | 0,0000 | 0.60 (0.33-0.87) | 153.05   | 64.30 | 66.70 |
| CC5a          | 83.1 (49.7-116.4)         | 79.4 (37.8-121.0)        | 37.1 (11.6-62.5)         | 0.8894 | 0,0325 | 0,0876 | 0.53 (0.26-0.79) | 68.4     | 64.30 | 66.70 |
| MMP7          | 190.8 (47.8-333.8)        | 177.8 (-0.5-356.1)       | 144.1 (34.9-253.3)       | 0.9092 | 0,6034 | 0,7469 | 0.76 (0.52-1.00) | 91.57    | 92.90 | 55.60 |
| Ab42          | 201.6 (59.0-344.3)        | 178.8 (0.9-356.7)        | 354.5 (245.6-463.5)      | 0.9374 | 0,1423 | 0,1287 | 0.55 (0.29-0.81) | 120.305  | 71.40 | 55.60 |
| #CC5          | 576.3 (303.8-848.9)       | 590.7 (250.8-930.7)      | 186.4 (-21.8-394.6)      | 0.9473 | 0,0268 | 0,0469 | 0.61 (0.36-0.87) | 465.65   | 66.70 | 71.40 |
| IFN- $\gamma$ | 529.2 (396.9-661.6)       | 495.3 (330.3-660.4)      | 29.8 (-71.2-130.9)       | 0.9743 | 0,0002 | 0,0162 | 0.55 (0.28-0.81) | 445.145  | 57.10 | 55.60 |
| TNF- $\alpha$ | 91.1 (62.8-119.4)         | 86.9 (51.6-122.1)        | 14.2 (-7.4-35.9)         | 0.9877 | 0,0006 | 0,0434 | 0.58 (0.30-0.86) | 56.05    | 78.60 | 55.60 |
| Ab40          | 656.6 (206.0-1107.2)      | 648.0 (86.0-1210.0)      | 1223.5 (879.4-1567.7)    | 0.9989 | 0,0765 | 0,0892 | 0.51 (0.25-0.76) | 569.695  | 57.10 | 55.60 |

<sup>a</sup>Comparison between TBM with stroke and TBM without stroke. <sup>b</sup>Comparison between TBM with stroke and not-TBM. <sup>c</sup>Comparison between TBM without stroke and not-TBM.
