# Supplementary material for: Serum and cerebrospinal fluid host proteins indicate stroke in children with tuberculous meningitis
Source: PubMed Central journal article supplement (PMC8087017; doi:10.1371/journal.pone.0250944), 2021-04-30
Supplement: pone.0250944.s004.pdf [file pone.0250944.s004.pdf]

**S3 Table: Expression of serum host protein biomarkers amongst study participants with TBM and stroke/no stroke at admission, and utility of individual serum host protein biomarkers in indicating stroke in TBM patients.** The least square (LS) means (95% Confidence intervals) of all host markers and accuracies in the indication of stroke amongst children with TBM are shown. #reported in ng/ml, all other markers are reported in pg/ml.

| Marker            | TBM-stroke     | TBM-no stroke  | Not-TBM       | P value <sup>a</sup> | P value <sup>b</sup> | P value <sup>c</sup> | Utility in indicating stroke in TBM patients |               |               |               |
|-------------------|----------------|----------------|---------------|----------------------|----------------------|----------------------|----------------------------------------------|---------------|---------------|---------------|
|                   |                |                |               |                      |                      |                      | AUC (95% CI)                                 | Cut-off value | Sensitivity % | Specificity % |
| #D-dimer          | 4.1 (3.4-4.8)  | 2.1 (1.2-2.9)  | 3.6 (3.1-4.1) | 0.0187               | 0,2022               | 0,0860               | 0.83 (0.64-1.00)                             | 3.410048      | 100.00        | 66.70         |
| IL-13             | 0.6 (-0.1-1.3) | 2.0 (1.1-2.9)  | 1.3 (0.7-1.9) | 0.0194               | 0,1402               | 0,1808               | 0.73 (0.52-0.94)                             | 1.088349      | 77.80         | 78.60         |
| #ADAMTS13         | 3.0 (2.7-3.3)  | 2.1 (1.7-2.5)  | 2.7 (2.5-2.9) | 0.0314               | 0,1053               | 0,1524               | 0.82 (0.63-1.00)                             | 2.909587      | 85.70         | 66.70         |
| CCL2              | 2.5 (2.3-2.7)  | 2.2 (2.0-2.4)  | 2.8 (2.6-2.9) | 0.0322               | 0,0094               | 0,0000               | 0.82 (0.63-1.00)                             | 2.311411      | 92.90         | 66.70         |
| #SAA              | 4.9 (3.9-5.8)  | 2.1 (0.9-3.3)  | 3.9 (3.2-4.7) | 0.0325               | 0,0797               | 0,1829               | 0.75 (0.50-1.00)                             | 3.356864      | 100.00        | 66.70         |
| Ferritin          | 4.9 (3.9-5.8)  | 2.2 (1.0-3.4)  | 4.1 (3.3-4.8) | 0.0327               | 0,1303               | 0,1529               | 0.77 (0.53-1.00)                             | 4.220998      | 92.90         | 66.70         |
| GDF-15            | 0.4 (0.2-0.6)  | 0.1 (-0.1-0.3) | 0.4 (0.3-0.6) | 0.0364               | 0,9423               | 0,0196               | 0.90 (0.78-1.00)                             | 0.296527      | 78.60         | 88.90         |
| GDNF              | 2.2 (1.8-2.6)  | 1.1 (0.6-1.6)  | 1.8 (1.5-2.1) | 0.0518               | 0,0974               | 0,2598               | 0.72 (0.46-0.97)                             | 1.771286      | 100.00        | 55.60         |
| IL-7              | 1.7 (1.5-1.8)  | 1.4 (1.1-1.6)  | 1.4 (1.2-1.5) | 0.0549               | 0,0107               | 0,8916               | 0.79 (0.59-1.00)                             | 1.467458      | 85.70         | 66.70         |
| MMP-9             | 5.4 (4.4-6.5)  | 2.6 (1.2-3.9)  | 4.4 (3.6-5.2) | 0.0560               | 0,0632               | 0,2652               | 0.68 (0.39-0.98)                             | 5.137117      | 85.70         | 66.70         |
| CC5a              | 3.4 (3.3-3.5)  | 3.6 (3.4-3.7)  | 3.4 (3.3-3.5) | 0.0624               | 0,9755               | 0,0450               | 0.74 (0.51-0.96)                             | 3.414416      | 88.90         | 71.40         |
| #LIPOCALIN-2/NGAL | 2.7 (2.2-3.3)  | 1.3 (0.6-2.0)  | 2.2 (1.8-2.7) | 0.0629               | 0,1071               | 0,2724               | 0.74 (0.47-1.00)                             | 2.562729      | 71.40         | 77.80         |
| IL-4              | 1.8 (1.5-2.1)  | 1.0 (0.6-1.4)  | 2.1 (1.9-2.3) | 0.0673               | 0,1780               | 0,0116               | 0.81 (0.58-1.00)                             | 1.543709      | 92.90         | 77.80         |
| #P-Selectin       | 2.4 (1.9-2.9)  | 1.2 (0.5-1.8)  | 1.8 (1.4-2.2) | 0.0704               | 0,0380               | 0,4370               | 0.69 (0.41-0.96)                             | 1.006566      | 100.00        | 55.60         |
| #Myoglobin        | 1.2 (0.8-1.5)  | 0.7 (0.3-1.1)  | 1.2 (1.0-1.5) | 0.0856               | 0,8942               | 0,0476               | 0.74 (0.47-1.00)                             | 0.791936      | 100.00        | 66.70         |
| #CC2              | 4.1 (3.9-4.3)  | 4.4 (4.1-4.7)  | 4.3 (4.1-4.5) | 0.1027               | 0,1919               | 0,4992               | 0.73 (0.52-0.94)                             | 4.133227      | 88.90         | 64.30         |
| MMP-8             | 4.6 (3.8-5.3)  | 3.6 (2.7-4.5)  | 3.8 (3.3-4.4) | 0.1086               | 0,1106               | 0,6990               | 0.66 (0.37-0.95)                             | 4.074843      | 100.00        | 55.60         |
| IL-1b             | 0.0 (-0.3-0.3) | 0.6 (0.2-0.9)  | 0.5 (0.1-0.6) | 0.1154               | 0,0164               | 0,7429               | 0.72 (0.55-0.89)                             | 0.387258      | 44.40         | 100.00        |
| #CC4              | 4.7 (4.5-4.8)  | 4.8 (4.7-5.0)  | 4.6 (4.5-4.7) | 0.1197               | 0,4371               | 0,0202               | 0.70 (0.45-0.94)                             | 4.608858      | 77.80         | 64.30         |
| sRAGE             | 2.9 (2.9-3.0)  | 2.8 (2.7-2.9)  | 2.9 (2.8-3.0) | 0.1257               | 0,5798               | 0,2724               | 0.65 (0.37-0.92)                             | 2.910854      | 78.60         | 55.60         |

|                              |                |                |               |        |        |        |                  |          |       |        |
|------------------------------|----------------|----------------|---------------|--------|--------|--------|------------------|----------|-------|--------|
| IL-10                        | 0.1 (-0.2-0.4) | 0.5 (0.1-0.9)  | 0.8 (0.6-1.1) | 0.1546 | 0,0015 | 0,3626 | 0.75 (0.55-0.95) | 0.177054 | 66.70 | 78.60  |
| RANTES                       | 4.9 (4.7-5.1)  | 5.2 (4.9-5.4)  | 4.9 (4.8-5.1) | 0.1581 | 0,7191 | 0,2149 | 0.73 (0.49-0.97) | 5.021645 | 77.80 | 64.30  |
| #CC4b                        | 4.4 (4.3-4.5)  | 4.6 (4.4-4.7)  | 4.3 (4.2-4.4) | 0.1736 | 0,2584 | 0,0163 | 0.79 (0.59-0.98) | 4.492727 | 77.80 | 71.40  |
| CCL1                         | 1.4 (1.1-1.6)  | 1.1 (0.8-1.4)  | 1.3 (1.1-1.4) | 0.1819 | 0,4661 | 0,3999 | 0.75 (0.49-1.00) | 1.187097 | 71.40 | 77.80  |
| #MBL                         | 3.9 (3.5-4.2)  | 4.2 (3.8-4.7)  | 3.6 (3.4-3.9) | 0.1900 | 0,2575 | 0,0187 | 0.67 (0.42-0.92) | 4.30793  | 55.60 | 85.70  |
| #SAP                         | 5.7 (5.4-5.9)  | 5.4 (5.2-5.7)  | 5.3 (5.1-5.4) | 0.2394 | 0,0082 | 0,2874 | 0.71 (0.46-0.95) | 5.461748 | 78.60 | 66.70  |
| #CC5                         | 4.7 (4.6-4.8)  | 4.7 (4.5-4.8)  | 4.6 (4.5-4.6) | 0.3149 | 0,0049 | 0,1583 | 0.45 (0.15-0.75) | 4.739838 | 71.40 | 55.60  |
| MMP7                         | 2.9 (2.4-3.5)  | 2.1 (1.4-2.8)  | 2.8 (2.4-3.3) | 0.3231 | 0,8378 | 0,4824 | 0.55 (0.22-0.88) | 2.73654  | 92.90 | 55.60  |
| IFN- $\gamma$                | 0.3 (-0.2-0.8) | 0.7 (0.1-1.3)  | 0.5 (0.1-0.8) | 0.3237 | 0,5436 | 0,5754 | 0.59 (0.40-0.78) | 0.71536  | 33.30 | 85.70  |
| Apo AI                       | 5.5 (5.4-5.5)  | 5.5 (5.5-5.6)  | 5.4 (5.3-5.5) | 0.3302 | 0,2416 | 0,0417 | 0.67 (0.45-0.90) | 5.465526 | 77.80 | 57.10  |
| IL-17A                       | 0.0 (-0.3-0.3) | 0.3 (-0.1-0.7) | 0.6 (0.3-0.8) | 0.3508 | 0,0045 | 0,5622 | 0.61 (0.47-0.76) | 0.544245 | 22.20 | 100.00 |
| #Adipsin/Complement factor D | 3.3 (3.2-3.4)  | 3.5 (3.3-3.6)  | 3.5 (3.4-3.6) | 0.3522 | 0,0010 | 0,9611 | 0.44 (0.17-0.71) | 3.266696 | 55.60 | 64.30  |
| MPO                          | 6.5 (6.3-6.6)  | 6.6 (6.4-6.8)  | 6.5 (6.4-6.6) | 0.3680 | 0,9841 | 0,3339 | 0.6 (0.35-0.84)  | 6.684858 | 55.60 | 64.30  |
| #CC9                         | 3.5 (3.4-3.6)  | 3.6 (3.4-3.7)  | 3.5 (3.5-3.6) | 0.3706 | 0,4302 | 0,7627 | 0.45 (0.18-0.73) | 3.511713 | 55.60 | 64.30  |
| PDGF-AB/BB                   | 4.6 (4.4-4.9)  | 4.8 (4.5-5.1)  | 4.4 (4.3-4.6) | 0.3949 | 0,1346 | 0,0295 | 0.70 (0.45-0.95) | 4.746888 | 77.80 | 78.60  |
| G-CSF                        | 1.2 (0.7-1.8)  | 0.9 (0.2-1.6)  | 1.9 (1.5-2.3) | 0.4012 | 0,0669 | 0,0146 | 0.57 (0.31-0.83) | 1.092559 | 64.30 | 66.70  |
| #PEDF                        | 4.3 (4.3-4.4)  | 4.4 (4.3-4.5)  | 4.3 (4.3-4.4) | 0.4414 | 0,8270 | 0,3048 | 0.58 (0.29-0.87) | 4.347646 | 55.60 | 64.30  |
| LL-37                        | 0.2 (0.1-0.2)  | 0.2 (0.1-0.3)  | 0.2 (0.1-0.2) | 0.4455 | 0,8111 | 0,5324 | 0.56 (0.29-0.82) | 0.162206 | 66.70 | 57.10  |
| CCL3                         | 1.2 (0.6-1.7)  | 1.5 (0.8-2.3)  | 1.4 (1.0-1.9) | 0.4513 | 0,4706 | 0,8388 | 0.70 (0.46-0.94) | 1.697793 | 66.70 | 85.70  |
| #CFH                         | 5.6 (5.5-5.7)  | 5.6 (5.5-5.7)  | 5.5 (5.4-5.6) | 0.4803 | 0,0376 | 0,0119 | 0.54 (0.27-0.81) | 5.624647 | 55.60 | 57.10  |
| CD40L                        | 4.1 (4.0-4.2)  | 4.0 (3.9-4.2)  | 4.0 (3.9-4.1) | 0.4904 | 0,3567 | 0,9674 | 0.61 (0.35-0.87) | 4.054332 | 71.40 | 55.60  |
| NCAM                         | 5.6 (5.5-5.7)  | 5.5 (5.4-5.7)  | 5.7 (5.6-5.7) | 0.5197 | 0,3882 | 0,1516 | 0.52 (0.26-0.77) | 5.641184 | 50.00 | 66.70  |
| #MIP4                        | 2.4 (2.3-2.6)  | 2.4 (2.2-2.5)  | 2.3 (2.2-2.4) | 0.5491 | 0,1611 | 0,5739 | 0.58 (0.32-0.83) | 2.446304 | 50.00 | 77.80  |
| BDNF                         | 4.1 (3.8-4.4)  | 4.2 (3.9-4.5)  | 4.1 (3.9-4.3) | 0.5639 | 0,9763 | 0,5451 | 0.67 (0.41-0.94) | 4.180373 | 77.80 | 64.30  |
| #Apolipoprotein CIII         | 5.1 (5.0-5.3)  | 5.2 (5.0-5.4)  | 5.0 (4.9-5.1) | 0.5835 | 0,0862 | 0,0402 | 0.43 (0.18-0.68) | 5.177141 | 55.60 | 57.10  |
| IL-6                         | 0.7 (0.4-1.1)  | 0.9 (0.5-1.3)  | 1.1 (0.9-1.4) | 0.5899 | 0,0705 | 0,3221 | 0.60 (0.35-0.84) | 1.172747 | 44.40 | 78.60  |
| sICAM1                       | 5.3 (5.2-5.4)  | 5.3 (5.2-5.5)  | 5.4 (5.3-5.5) | 0.6260 | 0,2193 | 0,5949 | 0.59 (0.34-0.83) | 5.371051 | 55.60 | 71.40  |
| CATHEPSIN-D                  | 5.6 (5.5-5.8)  | 5.7 (5.5-5.9)  | 5.7 (5.6-5.9) | 0.6418 | 0,2993 | 0,6971 | 0.53 (0.26-0.80) | 5.817493 | 44.40 | 78.60  |

|         |                |                |               |        |        |        |                  |          |       |        |
|---------|----------------|----------------|---------------|--------|--------|--------|------------------|----------|-------|--------|
| TNF-a   | 0.6 (0.3-0.9)  | 0.7 (0.3-1.1)  | 1.2 (0.9-1.5) | 0.7378 | 0,0074 | 0,0467 | 0.53 (0.28-0.78) | 1.011099 | 44.40 | 71.40  |
| PDGF-AA | 3.9 (3.7-4.1)  | 4.0 (3.7-4.3)  | 3.7 (3.6-3.9) | 0.7450 | 0,2877 | 0,2060 | 0.56 (0.30-0.82) | 3.931484 | 66.70 | 64.30  |
| Ab42    | 0.8 (0.1-1.5)  | 0.6 (-0.2-1.5) | 1.2 (0.6-1.7) | 0.7622 | 0,4039 | 0,2959 | 0.53 (0.34-0.72) | 1.373263 | 28.60 | 77.80  |
| PAI-1   | 5.5 (5.4-5.7)  | 5.5 (5.3-5.7)  | 5.4 (5.3-5.5) | 0.7890 | 0,0346 | 0,1208 | 0.48 (0.21-0.76) | 5.444422 | 64.30 | 44.40  |
| CXCL8   | 1.5 (1.3-1.8)  | 1.5 (1.2-1.8)  | 1.7 (1.5-1.9) | 0.7921 | 0,2157 | 0,1775 | 0.57 (0.31-0.83) | 1.547338 | 57.10 | 55.60  |
| CC4     | 5.1 (4.5-5.7)  | 5.2 (4.5-6.0)  | 4.5 (4.0-4.9) | 0.7955 | 0,1042 | 0,0939 | 0.65 (0.40-0.90) | 5.295138 | 55.60 | 85.70  |
| IL-21   | 0.2 (-0.1-0.6) | 0.2 (-0.3-0.6) | 0.5 (0.2-0.8) | 0.8134 | 0,3436 | 0,2846 | 0.48 (0.31-0.65) | 1.174291 | 14.30 | 100.00 |
| TGF-a   | 1.7 (1.3-2.0)  | 1.6 (1.2-2.1)  | 1.3 (1.0-1.6) | 0.8377 | 0,0872 | 0,2074 | 0.59 (0.32-0.87) | 1.62864  | 71.40 | 66.70  |
| CXCL10  | 1.9 (1.5-2.2)  | 1.9 (1.5-2.3)  | 2.2 (1.9-2.4) | 0.8452 | 0,1440 | 0,2927 | 0.54 (0.26-0.82) | 1.631567 | 55.60 | 85.70  |
| #CRP    | 5.1 (4.9-5.4)  | 5.2 (4.8-5.5)  | 5.0 (4.8-5.3) | 0.8463 | 0,5412 | 0,4615 | 0.57 (0.39-0.75) | 5.361477 | 88.90 | 28.60  |
| CXCL9   | 2.5 (1.6-3.4)  | 2.6 (1.5-3.8)  | 2.2 (1.5-2.9) | 0.8599 | 0,5741 | 0,4993 | 0.5 (0.25-0.75)  | 3.458014 | 44.40 | 71.40  |
| sVCAM-1 | 6.0 (5.9-6.2)  | 6.1 (5.9-6.2)  | 6.2 (6.2-6.4) | 0.8801 | 0,0009 | 0,0060 | 0.60 (0.34-0.86) | 6.081211 | 66.70 | 64.30  |
| VEGF    | 2.2 (2.1-2.4)  | 2.2 (2.0-2.4)  | 2.1 (2.0-2.2) | 0.9155 | 0,1797 | 0,2965 | 0.50 (0.25-0.75) | 2.211969 | 64.30 | 55.60  |
| #A1AT   | 4.4 (4.2-4.5)  | 4.4 (4.2-4.6)  | 4.2 (4.1-4.4) | 0.9201 | 0,1951 | 0,2207 | 0.57 (0.30-0.84) | 4.265778 | 55.60 | 64.30  |
| MMP-1   | 3.7 (3.5-3.9)  | 3.7 (3.5-4.00) | 3.5 (3.3-3.6) | 0.9262 | 0,0695 | 0,0957 | 0.56 (0.30-0.81) | 3.638005 | 66.70 | 50.00  |
| #CF1    | 4.8 (4.7-5.0)  | 4.8 (4.6-5.0)  | 4.8 (4.6-4.9) | 0.9263 | 0,4473 | 0,5796 | 0.48 (0.24-0.73) | 4.780595 | 50.00 | 66.70  |
| CCL4    | 2.1 (1.8-2.4)  | 2.1 (1.7-2.5)  | 2.6 (2.3-2.9) | 0.9415 | 0,0226 | 0,0572 | 0.61 (0.35-0.88) | 2.234462 | 55.60 | 85.70  |

<sup>a</sup>Comparison between TBM with stroke and TBM without stroke. <sup>b</sup>Comparison between TBM with stroke and not-TBM. <sup>c</sup>Comparison between TBM without stroke and not-TBM.
